# Supplementary material
Source: HighWire-hosted journal article supplement (https://diabetes.diabetesjournals.org/content/suppl/2003/03/21/52.3.795)
Supplement: arginine.pdf [file arginine.pdf]

Table 4 Noncompartmental parameters of NO system

|             | $k_{21}Q_1\%$<br>(%) | $k_{32}Q_2$  | $k_{21}Q_1$<br>( $\mu\text{mol/h/kg}$ ) | <b>P</b>     |
|-------------|----------------------|--------------|-----------------------------------------|--------------|
| N1          | 1.7                  | 0.227        | 0.007                                   | 0.373        |
| N2          | 3.1                  | 0.306        | 0.016                                   | 0.495        |
| N3          | 3.8                  | 0.667        | 0.042                                   | 1.073        |
| N4          | 2.5                  | 0.146        | 0.006                                   | 0.238        |
| N5          | 2.8                  | 0.516        | 0.024                                   | 0.838        |
| <b>Mean</b> | <b>2.8</b>           | <b>0.373</b> | <b>0.019</b>                            | <b>0.603</b> |
| <b>se</b>   | <b>0.3</b>           | <b>0.096</b> | <b>0.007</b>                            | <b>0.154</b> |
|             |                      |              |                                         |              |
| D1          | 2.7                  | 0.250        | 0.011                                   | 0.406        |
| D2          | 2.5                  | 0.165        | 0.007                                   | 0.270        |
| D3          | 0.3                  | 0.211        | 0.001                                   | 0.351        |
| D4          | 1.2                  | 0.787        | 0.016                                   | 1.299        |
| D5          | 2.4                  | 0.248        | 0.010                                   | 0.404        |
| D6          | 2.3                  | 0.207        | 0.008                                   | 0.337        |
| <b>Mean</b> | <b>1.9</b>           | <b>0.311</b> | <b>0.009</b>                            | <b>0.511</b> |
| <b>se</b>   | <b>0.4</b>           | <b>0.096</b> | <b>0.002</b>                            | <b>0.159</b> |

Table 5 Compartmental parameters of NO system

|             | $k_{21}Q_1\%$<br>(%) | <b>FSR</b><br>( $\%h^{-1}$ ) | $\tau$<br>(h) | $k_{32}Q_2$<br>( $\mu\text{mol/h/kg}$ ) | $k_{21}^*10$<br>( $h^{-1}$ ) | $k_{32}$<br>( $h^{-1}$ ) | $k_{02}$<br>( $h^{-1}$ ) | $k_{21}Q_1\%$<br>(%) | $Q_2$<br>( $\mu\text{mol/kg}$ ) | <b>P</b><br>( $\mu\text{mol/h/kg}$ ) |
|-------------|----------------------|------------------------------|---------------|-----------------------------------------|------------------------------|--------------------------|--------------------------|----------------------|---------------------------------|--------------------------------------|
| N1          | 1.74 (16)            | 0.13 (12)                    | 13.9 (24)     | 0.246 (16)                              | 0.007 (16)                   | 0.043 (24)               | 0.029 (24)               | 0.007 (16)           | 5.70 (40)                       | 0.403 (1)                            |
| N2          | 2.88 (15)            | 0.42 (19)                    | 6.9 (28)      | 0.263 (10)                              | 0.014 (15)                   | 0.088 (28)               | 0.058 (28)               | 0.013 (15)           | 3.01 (38)                       | 0.425 (4)                            |
| N3          | 4.25 (2)             | 0.58 (3)                     | 7.3 (4)       | 0.569 (14)                              | 0.032 (2)                    | 0.082 (4)                | 0.055 (4)                | 0.040 (2)            | 6.94 (18)                       | 0.908 (1)                            |
| N4          | 2.21 (7)             | 0.64 (7)                     | 3.5 (22)      | 0.149 (5)                               | 0.005 (7)                    | 0.170 (22)               | 0.114 (22)               | 0.006 (7)            | 0.88 (12)                       | 0.243 (2)                            |
| N5          | 1.99 (3)             | 0.57 (9)                     | 3.5 (9)       | 0.727 (14)                              | 0.023 (3)                    | 0.173 (9)                | 0.115 (9)                | 0.024 (3)            | 4.19 (23)                       | 1.187 (1)                            |
| <b>Mean</b> | <b>2.61</b>          | <b>0.47</b>                  | <b>7.0</b>    | <b>0.391</b>                            | <b>0.016</b>                 | <b>0.111</b>             | <b>0.074</b>             | <b>0.018</b>         | <b>4.14</b>                     | <b>0.633</b>                         |
| <b>se</b>   | <b>0.45</b>          | <b>0.09</b>                  | <b>1.9</b>    | <b>0.110</b>                            | <b>0.005</b>                 | <b>0.026</b>             | <b>0.017</b>             | <b>0.006</b>         | <b>1.05</b>                     | <b>0.178</b>                         |
|             |                      |                              |               |                                         |                              |                          |                          |                      |                                 |                                      |
| D1          | 2.72 (2)             | 0.94 (5)                     | 2.9 (6)       | 0.244 (8)                               | 0.008 (2)                    | 0.208 (6)                | 0.138 (6)                | 0.011 (2)            | 1.18 (13)                       | 0.396 (1)                            |
| D2          | 2.80 (26)            | 0.25 (21)                    | 16.5 (43)     | 0.175 (9)                               | 0.006 (26)                   | 0.036 (43)               | 0.024 (43)               | 0.008 (26)           | 3.23 (52)                       | 0.284 (1)                            |
| D3          | 0.27 (16)            | 0.14 (47)                    | 1.9 (57)      | 0.198 (9)                               | 0.001 (16)                   | 0.308 (57)               | 0.205 (57)               | 0.001 (16)           | 0.64 (68)                       | 0.329 (1)                            |
| D4          | 1.27 (7)             | 0.15 (10)                    | 8.6 (15)      | 0.678 (7)                               | 0.027 (6)                    | 0.070 (15)               | 0.046 (15)               | 0.014 (7)            | 9.74 (23)                       | 1.116 (1)                            |
| D5          | 2.34 (34)            | 0.12 (24)                    | 17.9 (52)     | 0.282 (20)                              | 0.006 (34)                   | 0.034 (52)               | 0.022 (52)               | 0.010 (34)           | 8.39 (72)                       | 0.458 (1)                            |
| D6          | 2.42 (7)             | 0.40 (9)                     | 6.0 (13)      | 0.190 (15)                              | 0.010 (6)                    | 0.100 (13)               | 0.067 (13)               | 0.008 (7)            | 1.90 (30)                       | 0.310 (2)                            |
| <b>Mean</b> | <b>1.97</b>          | <b>0.33</b>                  | <b>9.0</b>    | <b>0.295</b>                            | <b>0.010</b>                 | <b>0.126</b>             | <b>0.084</b>             | <b>0.009</b>         | <b>4.18</b>                     | <b>0.482</b>                         |
| <b>sd</b>   | <b>0.41</b>          | <b>0.13</b>                  | <b>2.8</b>    | <b>0.078</b>                            | <b>0.004</b>                 | <b>0.045</b>             | <b>0.030</b>             | <b>0.002</b>         | <b>1.59</b>                     | <b>0.129</b>                         |
